# Supplementary material for: Effect of saffron supplementation on oxidative stress markers (MDA, TAC, TOS, GPx, SOD, and pro-oxidant/antioxidant balance): An updated systematic review and meta-analysis of randomized placebo-controlled trials
Source: PubMed Central journal article supplement (PMC9928952; doi:10.3389/fmed.2023.1071514), 2023-02-01
Supplement: Image_1.pdf [file Image_1.pdf]

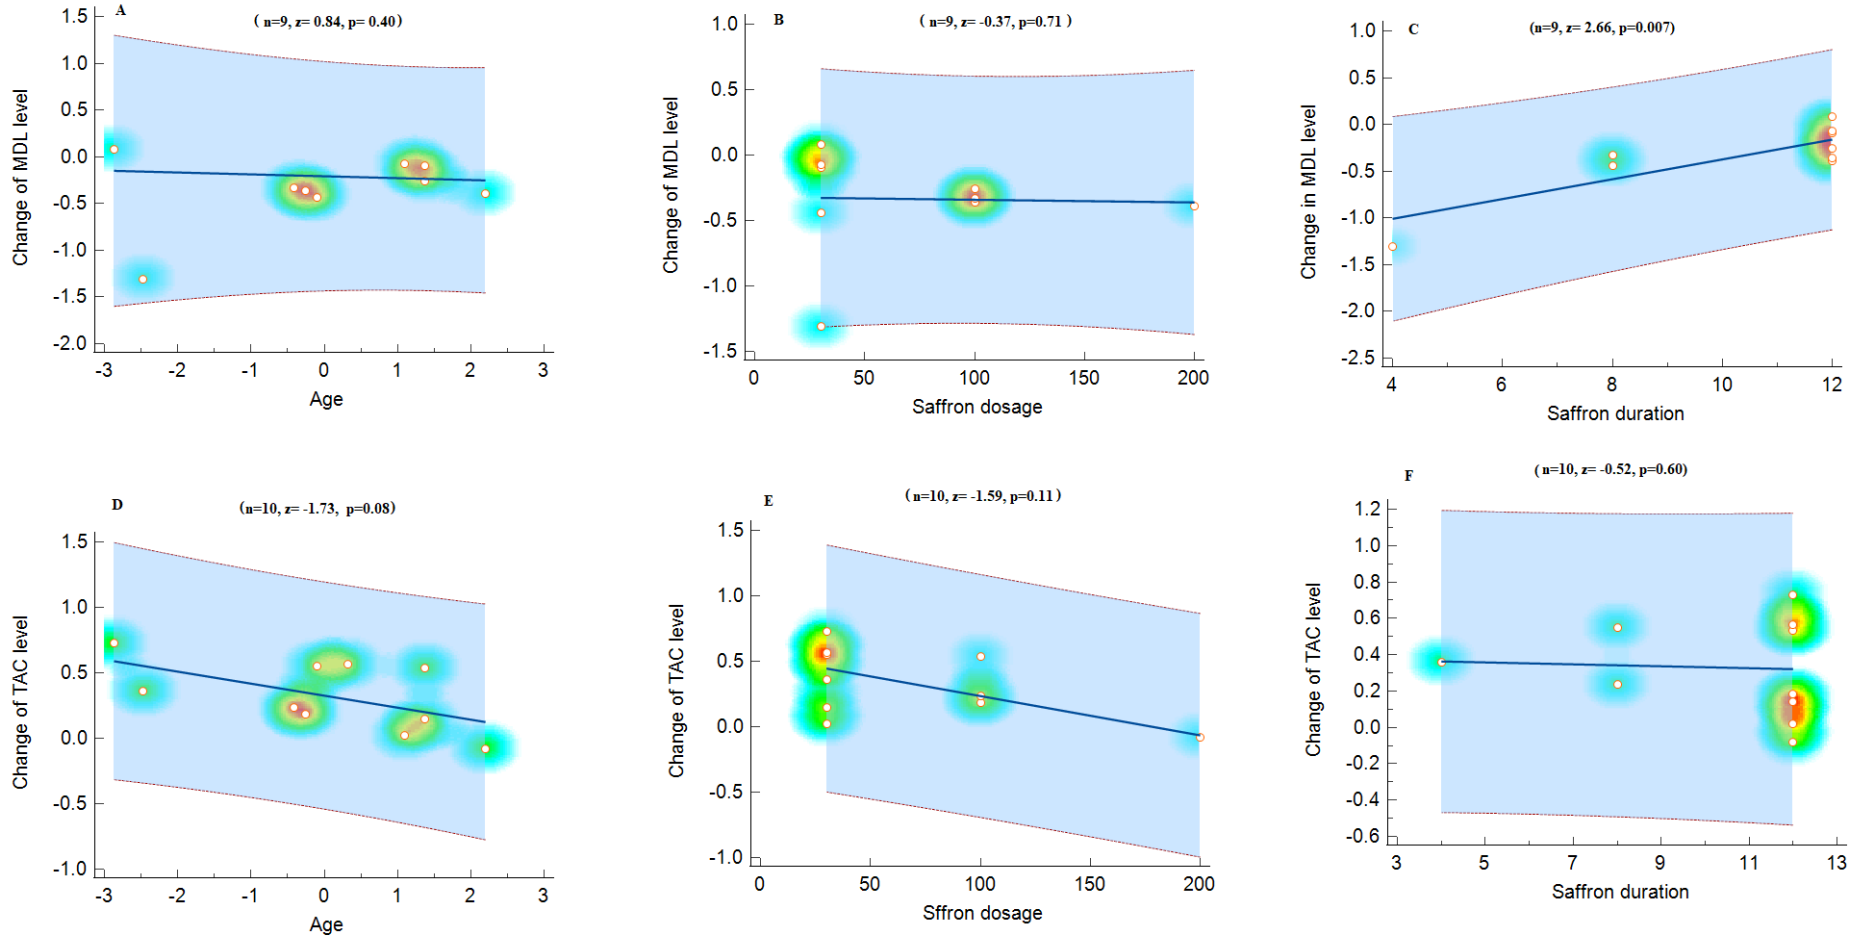

Supplementary Fig. 1. Meta-Regression scatter plots
